# Supplementary material
Source: PubMed Central journal article supplement (PMC4457561)
Supplement: NIHMS682533-supplement-supplement_1.pdf [file NIHMS682533-supplement-supplement_1.pdf]

Supplemental table 1. Association of leisure-time physical activity (any activity versus none) with all-cause mortality, non-vascular death, and vascular death in the Northern Manhattan Study excluding those with baseline history of malignancy and any heart disease (n=780)

|                                                                  | <b>All-cause mortality :</b><br><b>Hazard ratio and 95%</b><br><b>confidence interval</b> | <b>Non-vascular death:</b><br><b>Hazard ratio and 95%</b><br><b>confidence interval</b> | <b>Vascular death:</b><br><b>Hazard ratio and 95%</b><br><b>confidence interval</b> |
|------------------------------------------------------------------|-------------------------------------------------------------------------------------------|-----------------------------------------------------------------------------------------|-------------------------------------------------------------------------------------|
| Any leisure-time physical activity versus none (univariate)      | 0.91 (0.80-1.02)                                                                          | 0.86 (0.73-1.02)                                                                        | 0.99 (0.82-1.21)                                                                    |
| Any leisure-time physical activity versus none (multi-variable)* | 0.84 (0.74-0.96)                                                                          | 0.82 (0.68-0.99)                                                                        | 0.93 (0.75-1.15)                                                                    |

Supplemental table 2. Association of leisure-time physical activity (MET-score) with all-cause mortality, non-vascular death, and vascular death in the Northern Manhattan Study excluding baseline malignancy and any heart disease (n=780).

|                                                              | <b>All-cause mortality<br/>Hazard ratio and 95%<br/>confidence interval</b> | <b>Non-vascular death<br/>Hazard ratio and 95%<br/>confidence interval</b> | <b>Vascular death<br/>Hazard ratio and 95%<br/>confidence interval</b> |
|--------------------------------------------------------------|-----------------------------------------------------------------------------|----------------------------------------------------------------------------|------------------------------------------------------------------------|
| Third quartile of MET-score versus no activity (univariate)  | 0.90 (0.79-1.03)                                                            | 0.82 (0.68-0.99)                                                           | 1.03 (0.83-1.27)                                                       |
| Fourth quartile of MET-score versus no activity (univariate) | 0.92 (0.79-1.07)                                                            | 0.94 (0.76-1.16)                                                           | 0.95 (0.74-1.22)                                                       |
| Third quartile of MET-score (range ) versus no activity *    | 0.86 (0.75-1.00)                                                            | 0.82 (0.67-1.01)                                                           | 0.97 (0.76-1.22)                                                       |
| Fourth quartile of MET-score (range ) versus no activity *   | 0.81 (0.69-0.96)                                                            | 0.83 (0.66-1.04)                                                           | 0.88 (0.68-1.16)                                                       |

\*Adjusted for age, race-ethnicity, high school education, health insurance, moderate alcohol use, tobacco use, hypertension, diabetes, low-density lipoprotein cholesterol, high-density lipoprotein cholesterol.

Supplemental table 3. Association of leisure-time physical activity stratified by BMI with all-cause mortality, non-vascular death, and vascular death in the Northern Manhattan Study excluding baseline malignancy and any heart disease (n=780).

|                                             |                                                   | <b>All-cause mortality: Adjusted Hazard ratio and 95% confidence interval</b> | <b>Non-vascular death: Adjusted Hazard ratio and 95% confidence interval</b> | <b>Vascular death: Adjusted Hazard ratio and 95% confidence interval</b> |
|---------------------------------------------|---------------------------------------------------|-------------------------------------------------------------------------------|------------------------------------------------------------------------------|--------------------------------------------------------------------------|
| Body-mass index less than 30                | Any leisure-time physical activity versus none *  | 0.77 (0.66-0.89)                                                              | 0.77 (0.63-0.94)                                                             | 0.80 (0.65-0.97)                                                         |
|                                             | Third quartile of MET-score versus no activity *  | 0.79 (0.67-0.94)                                                              | 0.75 (0.59-0.96)                                                             | 0.89 (0.68-1.17)                                                         |
|                                             | Fourth quartile of MET-score versus no activity * | 0.74 (0.61-0.89)                                                              | 0.79 (0.61-1.02)                                                             | 0.74 (0.54-1.02)                                                         |
| Body-mass index greater than or equal to 30 | Any leisure-time physical activity versus none *  | 1.11 (0.85-1.46)                                                              | 1.02 (0.70-1.48)                                                             | 1.29 (0.85-1.95)                                                         |

|  |                                                   |                  |                  |                  |
|--|---------------------------------------------------|------------------|------------------|------------------|
|  | Third quartile of MET-score versus no activity *  | 1.11 (0.83-1.50) | 1.05 (0.70-1.59) | 1.19 (0.75-1.90) |
|  | Fourth quartile of MET-score versus no activity * | 1.09 (0.77-1.55) | 0.96 (0.58-1.59) | 1.46 (0.88-2.45) |

\*Adjusted for age, race-ethnicity, high school education, health insurance, moderate alcohol use, tobacco use, hypertension, diabetes, low-density lipoprotein cholesterol, high-density lipoprotein cholesterol.

Note: p for interactions between LPTA and BMI<30 vs  $\geq$ 30 were < 0.05 only for all-cause mortality, and vascular mortality with the MET-score
